# Supplementary material for: A functional 4-hydroxybenzoate degradation pathway in the phytopathogen Xanthomonas campestris is required for full pathogenicity
Source: PubMed Central journal article supplement (PMC4682078; doi:10.1038/srep18456), 2015-12-17
Supplement: srep18456-s1.pdf [file srep18456-s1.pdf]

# Supplementary Materials

**Title:** A functional 4-hydroxybenzoate degradation pathway in the phytopathogen *Xanthomonas campestris* is required for full pathogenicity

**Authors:** Jia-Yuan Wang, Lian Zhou, Bo Chen, Shuang Sun, Wei Zhang, Ming Li, Hongzhi Tang, Bo-Le Jiang, Ji-Liang Tang, Ya-Wen He

## Contents

Supplementary Fig. S1

Supplementary Fig. S2

Supplementary Fig. S3

Supplementary Fig. S4

Supplementary Fig. S5

Supplementary Fig. S6

Supplementary Fig. S7

Supplementary Fig. S8

Supplementary Fig. S9

Supplementary Table S1

Supplementary Table S2

Supplementary Table S3

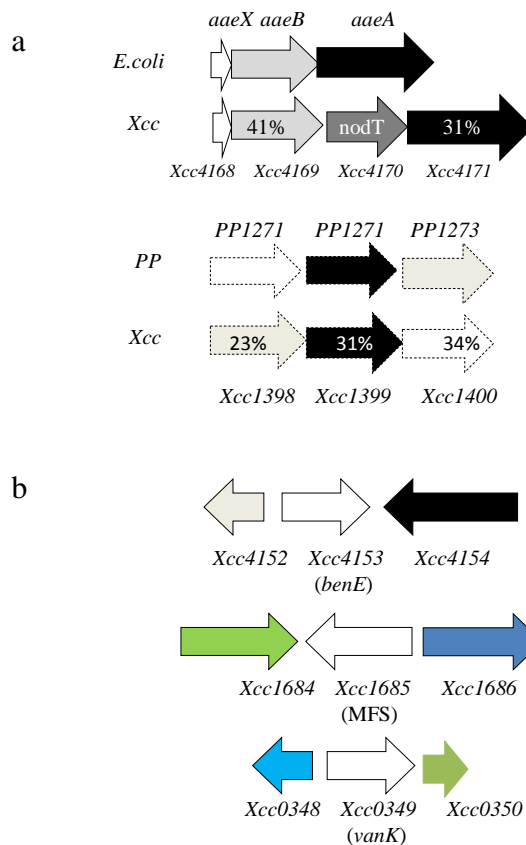

**Supplementary Fig. S1** Putative genes or gene clusters for 4-HBA transportation in *Xanthomonas campestris* pv. *campestris*. (a) Putative gene clusters for 4-HBA efflux pumping; (b) Putative genes for 4-HBA uptake. The percentage indicates amino acid identity. All sequences were downloaded from the Microbial Genome Database of NCBI.

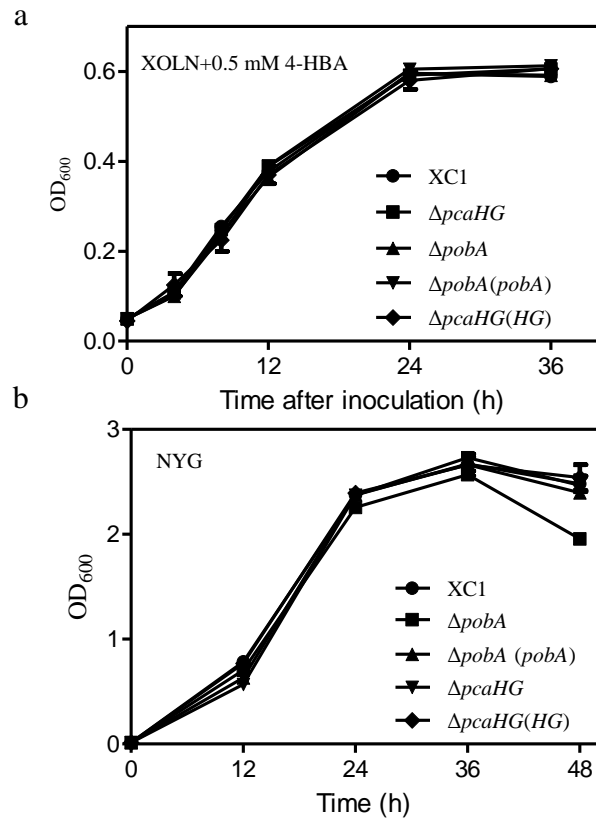

**Supplementary Fig. S2** Growth of *Xcc* strains in (a) XOLN medium or (b) NYG medium supplemented with 0.5 mM 4-HBA.

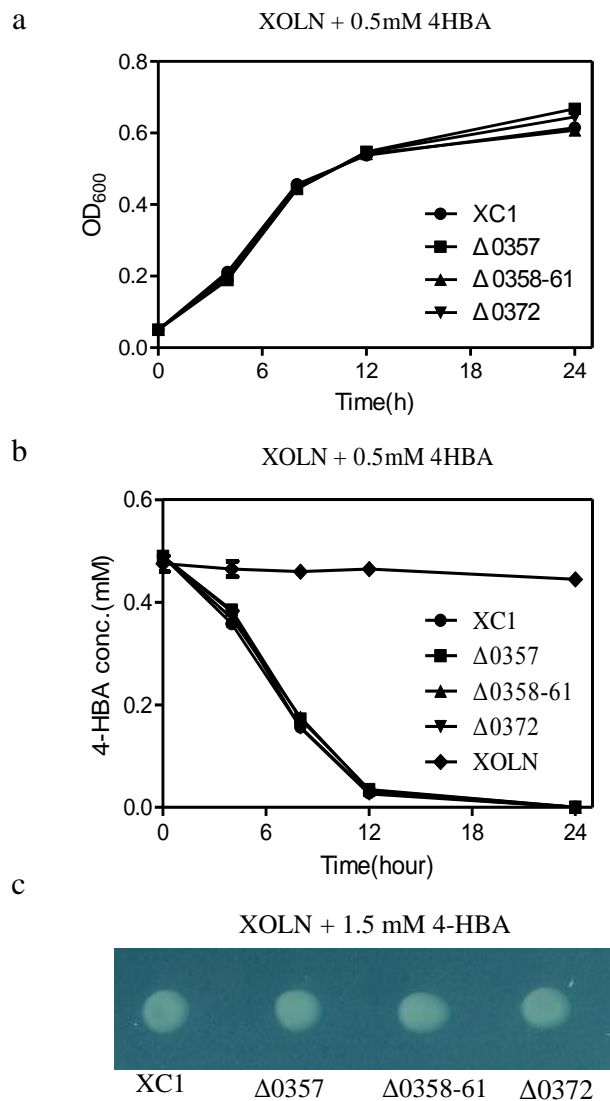

**Supplementary Fig. S3** The genes *Xcc0357*, *Xcc0358-61*, and *Xcc0372* are not required for 4-HBA degradation. (a) The growth of *Xcc* strains as determined at an optical density of 600 nm. (b) The 4-HBA levels in the cell cultures of *Xcc* strains during growth in XOLN medium. (c) Bacterial growth of *Xcc* strains on an XOLN plate supplemented with 1.5 mM 4-HBA.

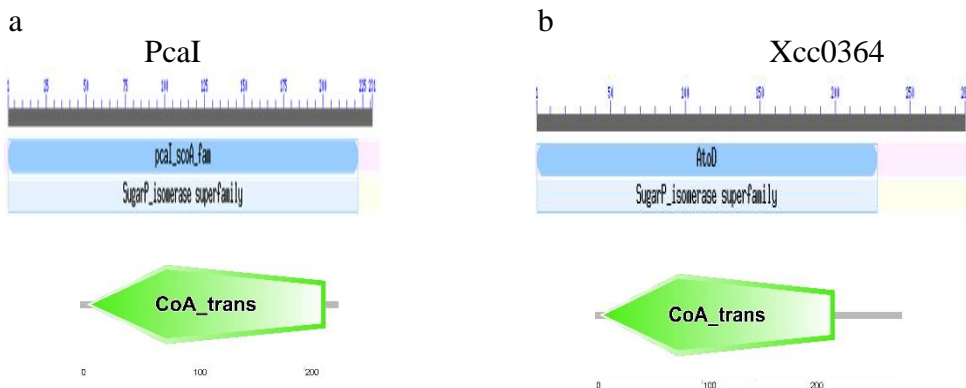

c

|         |                                                                                                                              |
|---------|------------------------------------------------------------------------------------------------------------------------------|
| Xcc0364 | MA-DIVSLSEAVAQLIADGDCVAMEGFTHL-IPHAAGHEVIRQRKRNLR-----                                                                       |
| pcaI    | MINKTYESIASAVEGITD <u>G</u> STIMV <u>GGFGT</u> A <u>GMP</u> SELIDGLIATGARDLTIISNNAGNGEI                                      |
|         | * . . :... :*:** . : : ** :* . :* *:*                                                                                        |
|         | Glycine cluster                                                                                                              |
| Xcc0364 | -----LVRMTPDLIYDQLIGAGCASALRF <sup>51</sup> SWGGNPGVGS <sup>101</sup> LHRLRDAVE                                              |
| pcaI    | GLAALLMAGSVRKVVC <sup>51</sup> SFPRQSDSYVFDELYRAGKIE-----                                                                    |
|         | : * : . :*: * ** .                                                                                                           |
| Xcc0364 | HGWPAPLQLREHSHADMANAYVAGASGLP-FAVLRGYV-----GSDLPKVNDSIRFLQCP                                                                 |
| pcaI    | -----LEVVPQGNLAERIRAAGSGIGAFFSPTGYGTL <sup>101</sup> LAEGKETREID-----                                                        |
|         | * . :...*: *..** : * ** *.: :..                                                                                              |
| Xcc0364 | YTGQTLATSPAVNPDVTVIHAQQADRRGNVLLWGIL-GVQKEAALAARKVIVTVVEEIVDT                                                                |
| pcaI    | --GRMYVLEMP <sup>151</sup> LHAD <sup>151</sup> FALIKAHK <sup>151</sup> GDRWGNLTYRKAARNFGPIMAMA <sup>151</sup> AKTAIAQVDQVVEL |
|         | * : . . :. *.:*:*:*.** ** : . *:*:..* . *::*:                                                                                |
| Xcc0364 | LDAPPNACILPRWVVS <sup>201</sup> AVCVVPGGAAPS <sup>201</sup> YAHGYSARDNRFYLAWDAMARDRARFQAWIQ <sup>201</sup> A                 |
| pcaI    | GELDPEHIITPGIFVQ <sup>201</sup> RVAVTGA <sup>201</sup> AASSIAKAV-----                                                        |
|         | : * : * * .* . * * .** * * :.                                                                                                |
| Xcc0364 | HILDTDDFAGFQ <sup>251</sup> RVYAGSQHAEAA                                                                                     |
| pcaI    | -----                                                                                                                        |

**Supplementary Fig. S4** Domain organization and multiple sequence alignment of Xcc0364 and PcaI. (a) Domain organization of PcaI in *Pseudomonas putida*. (b) Domain organization of Xcc0364 in *Xcc*. (c) Sequence alignment of PcaI and Xcc0364. Domain organization was conducted using the SMART program (<http://smart.embl-heidelberg.de>). Sequence alignment was conducted using the program Clustal Omega (<http://www.ebi.ac.uk/Tools/msa/clustalo/>).

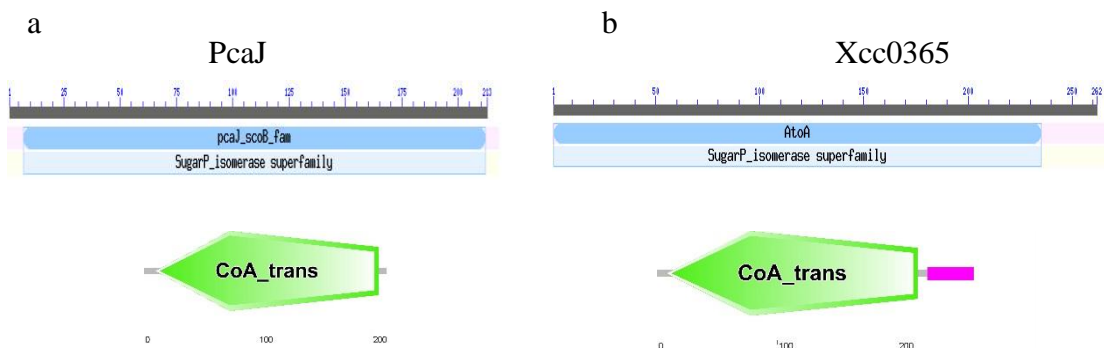

c

|         |                                                                       |
|---------|-----------------------------------------------------------------------|
| pcaJ    | MTITKKLSRTEMAQRVAADIQEGAYVNLGIGAPTLVANYL---GDKEVFLH <b>SENG</b> LLGMG |
| Xcc0365 | --MSDYSTNEMMTVAAAARRLPDGAVCFVGIGLPSTAAANLARLTHAPEVTLIYESGPIGAR        |
|         | :. .: * : .* : :** :*** *: .** ** * *. * :*                           |
|         | <b>SENG motif</b>                                                     |
| pcaJ    | PSPAPGEEDDDLINAGKQHVTLLTGGAFFHHADS-FSMRGGHLDIAVLGAFQVSVKGDL           |
| Xcc0365 | PQVLPLSIGDGELAETAD-----TVVSTPEIFRYWLQGGRVDVGF LGAAQIDRHANL            |
|         | *. * . * : : :.. : :***::*..*** *:. :. :*                             |
| pcaJ    | ANWH----TGAEGSIPAVGGAMDLATGARQVFVMMDHLLTKTGESKLVP-----                |
| Xcc0365 | NTTVIGPYAAPKTRLPGAGGAPEIATS AKQVFIIMRQSTRSFVQTLDFITTVGHLDGGDA         |
|         | . :. : :*..*** :**.*:***::* : *:: ..*                                 |
| pcaJ    | --ECTYPLTGIACVSRIYTDLAVLEVTPEGLKVV--EICADIDFDELQKLSGVPL-----          |
| Xcc0365 | RTRAGLPGAGP---TVVVTDLCVMEPDPVSRELTVTALHPGVTQAQVTAATGWAVRFAAT          |
|         | .. * :* : : ***.*:* * . :. : : : : * :                                |
| pcaJ    | -----IK-----                                                          |
| Xcc0365 | LTETAAPTATELHALRALQARTAAA HGTQAAGAEA                                  |
|         | .                                                                     |

**Supplementary Fig. S5** Domain organization and multiple sequence alignment of Xcc0365 and PcaJ. (a) Domain organization of PcaJ in *Pseudomonas putida*. (b) Domain organization of Xcc0365 in *Xcc*. (c) Sequence alignment of PcaJ and Xcc0365. Domain organization was conducted using the SMART program (<http://smart.embl-heidelberg.de>). Sequence alignment was conducted using the program Clustal Omega (<http://www.ebi.ac.uk/Tools/msa/clustalo/>).

## XCC0364 homologues in Bacteria

a

```

Xcc0364  MADIVSLSEAVAQLIADGDCVAMEGFTHLIPHAAGHEVIRQQRKRNRLVRMTPDLIYDQL
SMB20587 MARIMSLAEAVEENVRDGDTVAMEGFTHLIPYAAGHEVIRQGRKDLFLVRMTPDILYDQL
      ** *: **:*** : : *** *****:***** : : * *****: : ****
Xcc0364  IGAGCASALRFSWGNGPGVSLHRLRDAVEHGWPAPLQLREHSHADMANAYVAGASGLPF
SMB20587 IGVGAARGMKFSWGGNPGVSLHRFRDAVENQWPRPLEIEEHSHAAMANAYEAGAGNLPF
      ** . * . * . : : *****:***** . ** * : : . ***** ***** * . * . *
Xcc0364  AVLRGYVGSDDLPKVNDSIRFLQCPYTGQTLATSPAVNPDVTVIHAQQADRRGNVLLWGIL
SMB20587 AAFRGYIGADLPKVNLNIRSVTFCPTGEVLAAPAIRPDVTIIHAQRADRRGNVLIIEGIV
      * . : * * : * : * * * * . * * : * * : * * : * * : * * * * : * * : * * :
Xcc0364  GVQKEAALAARKVIVTVVEEIVDTLDAP-PNACILPRWVVSAVCVVPGGAAPSYAHGYSAR
SMB20587 GVQKEAVLAARRSIVTVVEEIVDELSPPSPNSVVLPGWAVTAVAHVPGGAFPSYAHGYPR
      * * * * * . * * * * : * * * * * * . * * * * : * * * . * : * * . * * * * * *
Xcc0364  DNRFYLAWDAMARDRARFQAWIQAHILDTD--DFAGFQRVYAGSQHAEEAA
SMB20587 SNAFYIRWDEIARDREFTTAWIRENVLAAKPEDFARHAAKTAAKV----A
      . * * * : * * : * * * * * * * : . : * . . * * * . * . . *
    
```

b

| Species                        | Homologues of Xcc0364 | Amino acid identity (%) | NCBI access No. |
|--------------------------------|-----------------------|-------------------------|-----------------|
| <i>Xac</i>                     | XAC0364               | 92                      | AAM35256.1      |
| <i>Xcr</i>                     | XCR_4151              | 99                      | AEL09008.1      |
| <i>Xff</i>                     | XFF4834R_chr03<br>480 | 92                      | CDF60017.1      |
| <i>Xoc</i>                     | XOC_4548              | 91                      | AEQ98605.1      |
| <i>Lysobacter capsici</i>      | AZ78_14030            | 79                      | EYR67734.1      |
| <i>Pseudomonas aeruginosa</i>  | PA0226                | 73                      | AAG03615.1      |
| <i>Pseudomonas knackmussii</i> | PKB_2952              | 72                      | CDF84299.1      |
| <i>Sinorhizobium meliloti</i>  | SMB20587              | 67                      | CAC49899.1      |
| <i>Mesorhizobium loti</i>      | MAFF_RS17350          | 58                      | BAB50895.1      |

**Supplementary Fig. S6** Homologs of Xcc0364 in other bacterial species. (a) Multiple sequence alignment analysis of Xcc0364 and SMB20588. (b) Putative homologs of Xcc0364 in other bacterial species.

a

```

Xcc0365  -----MSDYSTNEMMTVAAARRLPDGA VCFVGI GLPSTAANLARLTHAPEVTLIYESG
SMB20588 MLEGKTKMTHFTPTMMTVAAARALSND DVC FVGI GAPS AACNVARLTNAPDITLIYESG
          *:..: .***** * : ***** *:*.*:****.**:*****
Xcc0365  PIGARPQVLP LPSIGDGELAE TADTVVSTPEIFRYWLQGG RVDVGF LGAAQIDRHANLNTT
SMB20588 TVGTPDVLPLS IGDGELCDTALFTVSVPEMFRYWLQGG RITTGFLGGAQIDRFANLNTT
          :*:*:*****.**:** . **.*:*****: .****.*****.*****
Xcc0365  VIGPYAAPKTR LPGA GGAPEIATS AKQVFIIMRQSTRSFVQ TLD FITTVGHLDGGDARTR
SMB20588 VVGPYDHPKVR LPGA GGAPEIASNCGRIFITMALT KRGFVERLPFV TSMGHGEGGNHRER
          *:*** *.****.*****:.. **:** * :.*.**: * *:*:*** **: * *
Xcc0365  AGLPGAGPTVV VTDLCVME PDPVSRELTVTALHPGV TQAQVTAATGWAVRFAATLTETAA
SMB20588 LGLTTS GPTRVITDLC ILEPDPETKELTVVSMHPG VARDQIAGNCGWPIKFAETVIETPA
          ** : *** *:****.:**** :*****.:*****: *:. . ** ::** * : ** *
Xcc0365  PTATELHALRAL QARTAAAHGTQAAGAEA
SMB20588 PTETELVVL RDINARTKKAHKAAGKEAA-
          ** *** .** ::** ** : . *

```

b

| Species                               | Homologues of Xcc0365 | Amino acid identity (%) | NCBI access No. |
|---------------------------------------|-----------------------|-------------------------|-----------------|
| <i>X. axonopodis</i> pv. <i>citri</i> | XAC0365               | 89                      | AAM35257.1      |
| <i>Xcr</i>                            | XCR_4150              | 100                     | AEL09007.1      |
| <i>Xff</i>                            | XFF4834R_chr03490     | 89                      | CDF60018.1      |
| <i>Xoc</i>                            | XOC_4547              | 90                      | AEQ98604.1      |
| <i>Lysobacter capsici</i>             | AZ78_14025            | 76                      | EYR67733.1      |
| <i>Pseudomonas aeruginosa</i>         | PA0227                | 72                      | AAG03616.1      |
| <i>Pseudomonas knackmussii</i>        | PKB_2951              | 74                      | CDF84298.1      |
| <i>Sinorhizobium meliloti</i>         | SMB20588              | 60                      | CAC49900.1      |
| <i>Mesorhizobium loti</i>             | MAFF_RS17345          | 63                      | BAB50894.1      |

**Supplementary Fig. S7** Homologs of Xcc0365 in other bacterial species. (a) Multiple sequence alignment analysis of Xcc0365 and SMB20588. (b) Putative homologs of Xcc0365 in other bacterial species.



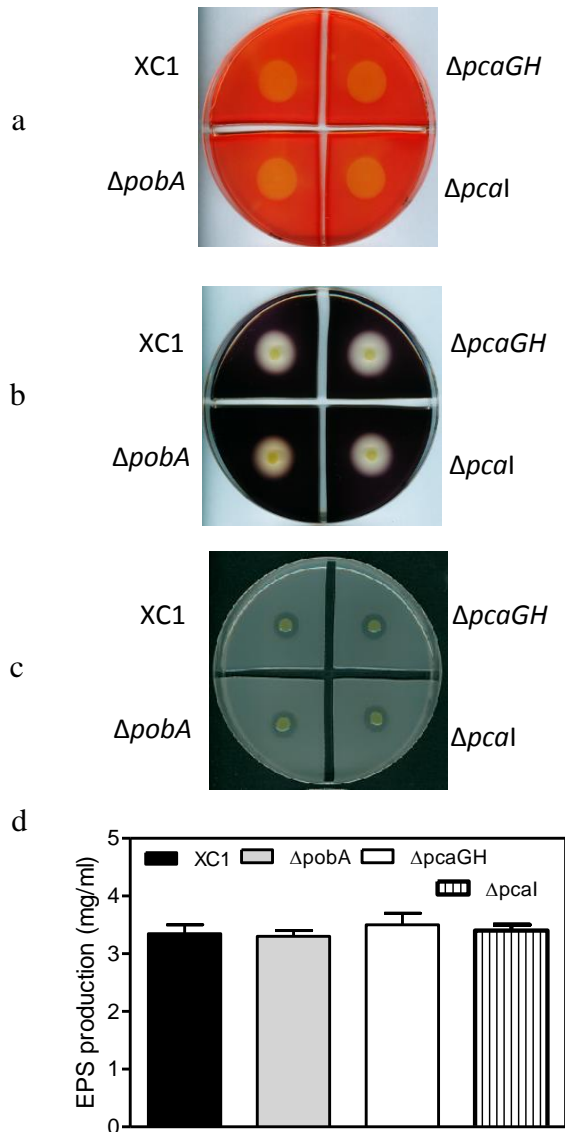

**Supplementary Fig. S8** Production of extracellular enzymes and polysaccharide (EPS) in *Xcc* strains. (a) Cellulase activity. About 1  $\mu$ L of the cell culture ( $OD_{600} \approx 1.0$ ) was spotted onto NYG containing 0.5% CMC. (b) Amylase activity. *Xcc* strains were grown on an NYG plate supplemented with 0.1% soluble starch. (c) Protease activity. The strains were grown on an NYG plate supplemented with 1.0% skim milk. (d) EPS production in NYG medium.

a

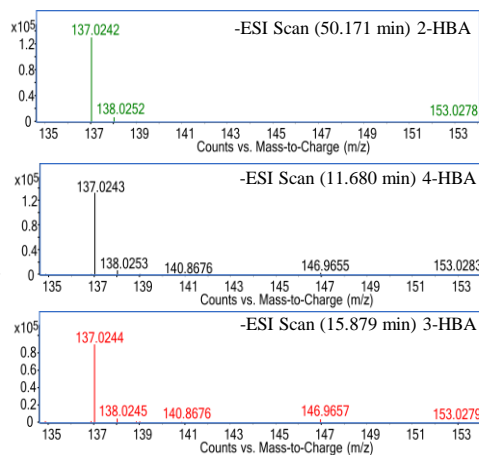

b

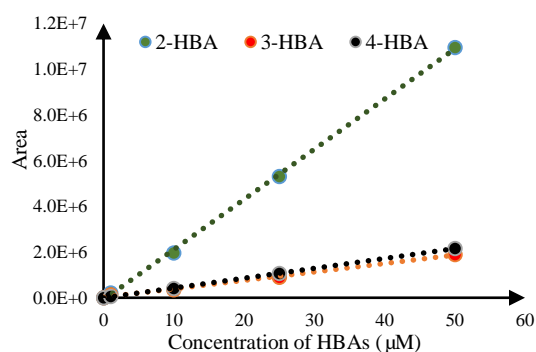

**Supplementary Fig. S9 LC-MS analysis of radish hydrolysates.** (a) Molecular weights of the putative 2-HBA, 3-HBA and 4-HBA detected in radish hydrolysates. (b) The established standard curves for determining the concentration of 2-HBA, 3-HBA and 4-HBA.

**Supplementary Table S1.** Bacterial strains used in this study

| Strains                | Relevant characteristics                                                                                                                                                                                   | Reference/source             |
|------------------------|------------------------------------------------------------------------------------------------------------------------------------------------------------------------------------------------------------|------------------------------|
| <b><i>Xcc</i> XC1</b>  | Wild type, Rif <sup>R</sup>                                                                                                                                                                                | Laboratory collection        |
| Δ0355                  | <i>xcc0355</i> in-frame deletion mutant of XC1                                                                                                                                                             | This study                   |
| Δ0356                  | <i>xcc0356</i> in-frame deletion mutant of XC1                                                                                                                                                             | This study                   |
| Δ0357                  | <i>xcc0357</i> in-frame deletion mutant of XC1                                                                                                                                                             | This study                   |
| Δ0358-61               | <i>xcc0358</i> , <i>xcc0359</i> , <i>xcc0360</i> , and <i>xcc0361</i> in-frame deletion mutant of XC1                                                                                                      | This study                   |
| Δ0364                  | <i>xcc0364</i> in-frame deletion mutant of XC1                                                                                                                                                             | This study                   |
| Δ0365                  | <i>xcc0365</i> in-frame deletion mutant of XC1                                                                                                                                                             | This study                   |
| Δ0364-65               | <i>xcc0364</i> and <i>xcc0365</i> in-frame deletion mutant of XC1                                                                                                                                          | This study                   |
| Δ0367-68               | <i>xcc0367</i> and <i>xcc0368</i> in-frame deletion mutant of XC1                                                                                                                                          | This study                   |
| Δ0370                  | <i>xcc0370</i> in-frame deletion mutant of XC1                                                                                                                                                             | This study                   |
| Δ0372                  | <i>xcc0372</i> in-frame deletion mutant of XC1                                                                                                                                                             | This study                   |
| Δ0373                  | <i>xcc0373</i> in-frame deletion mutant of XC1                                                                                                                                                             | This study                   |
| Δ0356C                 | Δ0356 mutant containing pBBR_0356 which contains full length <i>xcc0356</i>                                                                                                                                | This study                   |
| Δ0364C                 | Δ0364 mutant containing pBBR_0364 which contains full length <i>xcc0364</i>                                                                                                                                | This study                   |
| Δ0365C                 | Δ0365 mutant containing pBBR_0365 which contains full length <i>xcc0365</i>                                                                                                                                | This study                   |
| Δ0364( <i>pcaI</i> )   | Δ0364 mutant containing pBBR_0364 which contains full length <i>pcaI</i>                                                                                                                                   | This study                   |
| Δ0365( <i>pcaJ</i> )   | Δ0365 mutant containing pBBR_0365 which contains full length <i>pcaJ</i>                                                                                                                                   | This study                   |
| Δ0367-68C              | Δ0367-68 mutant containing pBBR_0367-68 which contains full length <i>xcc0367</i> and <i>xcc0368</i>                                                                                                       | This study                   |
| <b><i>P.putida</i></b> |                                                                                                                                                                                                            |                              |
| KT2440                 | Wild type                                                                                                                                                                                                  | Prof. Ping Xu lab collection |
| <b><i>E.coli</i></b>   |                                                                                                                                                                                                            |                              |
| DH5α                   | F <sup>+</sup> φ80 <i>lacZ</i> ΔM15 <i>endA</i> 1 <i>hsdR</i> 17 (r <sub>k</sub> <sup>-</sup> m <sub>k</sub> <sup>-</sup> ) <i>supE</i> 44 <i>thi</i> <sup>-1</sup> <i>gyrA</i> 96 Δ( <i>lacZYA-argF</i> ) | Laboratory collection        |
| S17-1                  | <i>recA pro</i> (RP4-2Tet::Mu Kan::Tn7)                                                                                                                                                                    | Simon et al., 1983           |

Simon, R., Prierer, U., and Puhler, A. 1983. A broad host range mobilization system for *in vivo* genetic engineering: transposon mutagenesis in gram negative bacteria. Nat Biotech 1:784-791

**Supplementary Table S2.** Plasmids used in this study

| Plasmids     | Relevant characteristics                                                                                        | Refernce/source             |
|--------------|-----------------------------------------------------------------------------------------------------------------|-----------------------------|
| pK18mobSacB  | Suicide plasmid in XCC, Km <sup>R</sup>                                                                         | Schafer et al., 1994        |
| pRK2013      | ColE1 replicon TraRK+ Mob+; Helper plasmid for mobilisation of non-self-transmissible plasmids, Km <sup>R</sup> | Figurski and Helinski, 1979 |
| pBBR1MCS2    | Plasmid for gene complementation, Km <sup>R</sup>                                                               | Kovach et al., 1995         |
| pK18-0355    | Sucide construct for in-frame deletion of <i>xcc0355</i>                                                        | This study                  |
| pK18-0356    | Sucide construct for in-frame deletion of <i>xcc0356</i>                                                        | This study                  |
| pK18-0357    | Sucide construct for in-frame deletion of <i>xcc0357</i>                                                        | This study                  |
| pK18-0358-61 | Sucide construct for in-frame deletion of <i>xcc0358</i> , <i>xcc0359</i> , <i>xcc0360</i> , and <i>xcc0361</i> | This study                  |
| pK18-0364    | Sucide construct for in-frame deletion of <i>xcc0364</i>                                                        | This study                  |
| pK18-0365    | Sucide construct for in-frame deletion of <i>xcc0365</i>                                                        | This study                  |
| pK18-0364-65 | Sucide construct for in-frame deletion of <i>xcc0364</i> and <i>xcc0365</i>                                     | This study                  |
| pK18-0367-68 | Sucide construct for in-frame deletion of <i>xcc0367</i> and <i>xcc0368</i>                                     | This study                  |
| pK18-0370    | Sucide construct for in-frame deletion of <i>xcc0370</i>                                                        | This study                  |
| pK18-0372    | Sucide construct for in-frame deletion of <i>xcc0372</i>                                                        | This study                  |
| pK18-0373    | Sucide construct for in-frame deletion of <i>xcc0373</i>                                                        | This study                  |
| pBBR0356     | Complementary vector containing whole length of <i>xcc0356</i>                                                  | This study                  |
| pBBR0364     | Complementary vector containing whole length of <i>xcc0364</i>                                                  | This study                  |
| pBBR0365     | Complementary vector containing whole length of <i>xcc0365</i>                                                  | This study                  |
| pBBR0367-68  | Complementary vector containing whole length of <i>xcc0367</i> and <i>xcc0368</i>                               | This study                  |
| pBBR-pcaI    | Complementary vector containing whole length of <i>pcaI</i>                                                     | This study                  |
| pBBR-pcaJ    | Complementary vector containing whole length of <i>pcaJ</i>                                                     | This study                  |

Figurski, D.H., and Helinski, D.R. 1979. Replication of an origin-containing derivative of plasmid RK2 dependent on a plasmid function provided in trans. Proceedings of the National Academy of Sciences of the United States of America 76:1648-1652.

Kovach, M.E., Elzer, P.H., Hill, D.S., Robertson, G.T., Farris, M.A., Roop, R.M., 2nd, and Peterson, K.M. 1995. Four new derivatives of the broad-host-range cloning vector pBBR1MCS, carrying different antibiotic-resistance cassettes. Gene 166:175-176.

Schafer, A., Tauch, A., Jager, W., Kalinowski, J., Thierbach, G., and Puhler, A. 1994. Small mobilizable multi-purpose cloning vectors derived from the Escherichia coli plasmids pK18 and pK19: selection of defined deletions in the chromosome of Corynebacterium glutamicum. Gene 145:69-73.

**Supplementary Table S3.** Primers used in this study

| Application       | Primers | Sequence(5'-3')                        |
|-------------------|---------|----------------------------------------|
| In-frame deletion |         |                                        |
| Δ0355             | 0355-F1 | cccagccaccgaaacggatacacc               |
|                   | 0355-R1 | cgctacagccgcagatacattacgc              |
|                   | 0355-F2 | tctgcggtgtagcgggtggctgccgacctggatttttc |
|                   | 0355-R2 | caccacagacggcctgttctatgc               |
| Δ0356             | 0356-F1 | ggaattctcggcaaggctggcaaagacaaga        |
|                   | 0356-R1 | aacctgggtgcgcatacggagt                 |
|                   | 0356-F2 | atgcgcaccaggttgcggcggtgtgcagcagtattc   |
|                   | 0356-R2 | cgggatcccagcaacaggcgcgggagaac          |
| Δ0357             | 0357-F1 | gcccagccgcagccgttactacct               |
|                   | 0357-R1 | cgctcgccgtagacgctttg                   |
|                   | 0357-F2 | tctagcggcgagcggaccgcgtgatccgtccaaga    |
|                   | 0357-R2 | ccgggcatggcgaagaacacctat               |
| Δ0358-61          | 0361-F1 | cgacgcggcgaatgtgggtt                   |
|                   | 0361-R1 | cgcccatacgccaggttctcc                  |
|                   | 0358-F2 | ctggcgtatcgggcgcggcaccagcaaggaacct     |
|                   | 0358-R2 | ccgcaacccaaccaccagaaa                  |
| Δ0364             | 0364-F1 | ggaattccggcctgcgcgtttagacc             |
|                   | 0364-R1 | ggcgtgcgggatcaggtgggtaa                |
|                   | 0364-F2 | ctgatcccgcacgccgcggaggcggcatgagcgacta  |
|                   | 0364-R2 | cgggatcctggactgccgcatgatgatgaagc       |
| Δ0365             | 0365-F1 | ggaattccccggacctgatttacgaccaac         |
|                   | 0365-R1 | gcccgatgccgacgaaacacacc                |
|                   | 0365-F2 | ttcgtcggcatcggcggagccgaggcatgagcgagg   |
|                   | 0365-R2 | cgggatcctccaggcgcggattgatgaagc         |
| Δ0364-65          | 0364-F1 | ggaattccggcctgcgcgtttagacc             |
|                   | 0364-R1 | ggcgtgcgggatcaggtgggtaa                |
|                   | 0365-F3 | ctgatcccgcacgccgagccgaggcatgagcgagg    |
|                   | 0365-R2 | cgggatcctccaggcgcggattgatgaagc         |
| Δ0367-68          | 0367-F1 | cgcgcgggtgctggggtttg                   |
|                   | 0367-R1 | gcccgatagccgagcaggacat                 |
|                   | 0368-F2 | ctcggctatcggcgcctcgtgttcacgcgggctgt    |
|                   | 0368-R2 | gtggcactggcggcaatgacc                  |
| Δ0370             | 0370-F1 | gcggcgtatggtgctgctga                   |
|                   | 0370-R1 | gcatgtgtcggcaactggagaaa                |
|                   | 0370-F2 | ttgccacacatgcacacgctgctgctgggtttctc    |
|                   | 0370-R2 | tcgggtcgtatgtctttgttga                 |

|                 |           |                                       |
|-----------------|-----------|---------------------------------------|
| Δ0372           | 0372-F1   | gcctgcccgccacactcg                    |
|                 | 0372-R1   | cggcagccgcgaccacaccac                 |
|                 | 0372-F2   | tggtcgcggctgccgctgctgctgcgcggtgtggatg |
|                 | 0372-R2   | cctggcggccctgggttatgtg                |
| Δ0373           | 0373-F1   | ggaattcacgccggcgtccaccagttg           |
|                 | 0373-R1   | gggacgtttgcggcgggaagag                |
|                 | 0373-F2   | cgccgcaaacgtcccctgcgtggcgaggtgattgc   |
|                 | 0373-R2   | cgggatcctgttgcggcgtggtgctgtatg        |
| Complementation |           |                                       |
| 0356            | 0356-F    | cccaagctttcggcaaggctggcaaagacaaga     |
|                 | 0356-R    | cgggatcccgcctcggcgtagacgctttgac       |
| 0364            | 0364-F    | cccaagcttcggccctgcgcgtttagacc         |
|                 | 0364-R    | gctctagagccgatgccgacgaaacacacc        |
| 0365            | 0365-F    | cccaagcttatccgttctgcagtgccctac        |
|                 | 0365-R    | gctctagactggacagtgcgccgccgtaa         |
| 0367-68         | 0367-68-F | cccaagcttcgcgcgggtgctggggtttg         |
|                 | 0367-68-R | gctctagaccctggcgacctgtgcaacaactac     |
| pcaI            | 3951-F    | ggaattcactgcatcgaaccactggaaageg       |
|                 | 3951-R    | cgggatcccgggtgcgggagagcttttgggtga     |
| pcaJ            | 3952-F    | ggaattccaacctggccgagcgtatccg          |
|                 | 3952-R    | cgggatcctcgaagcggctgtaaaggtagtctcaag  |
| qRT-PCR         |           |                                       |
| 0364            | RT0364-F  | cttttctggggcggcaatcct                 |
|                 | RT0364-R  | ccatgtccgcgtggctgtgttc                |
| 0365            | RT0365-1  | caccccgagatctttcgtattgg               |
|                 | RT0365-2  | cagatgaccgacggtggtgatgaa              |
| atpD            | atpD-F    | gcgatggtgtacggccagatgaa               |
|                 | atpD-R    | cggccagcgttagcggtagatgt               |
